# Supplementary material
Source: MDPI journal article supplement (https://www.mdpi.com/2072-4292/14/24/6205)
Supplement: s1 [file s1]

## Supplementary materials for:

Suitability of UAV-derived DSMs and impact of DEM resolutions on rockfall numerical simulations: case study of the Bouanane active scarp, Tétouan, Northern Morocco

*Ali Bounab , Younes El Kharim , Rachid El Hamdouni*

**Table S1.** Hardware specifications and UAV acquisition parameters.

| Parameter                               | Value/Specifications   |
|-----------------------------------------|------------------------|
| UAV                                     | DJI Phantom 4          |
| Positioning system                      | GPS                    |
| Maximum wind resistance                 | 10 m/s                 |
| Mean wind speed at the acquisition date | 8,6 m/s                |
| Altitude of flight (above sea level)    | 454.182 m              |
| Altitude above ground level (range)     | 20 – 305 m             |
| Camera                                  | DJI- FC6310            |
| Exposure time                           | 1/200 s                |
| ISO sensitivity                         | ISO-100                |
| Acquisition date                        | 23/01/2018             |
| Area covered                            | 2.6123 km <sup>2</sup> |
| Image overlap                           | 87 %                   |

**Table S2.** b-axis measurements (cm) for pebbles forming the scree deposits downhill of Bouanane cliff. Location of measurement stations is presented in table. S2.

| Station n° | S1   | S2  | S3   | S4  | S5   | S6   | S7   | S8  | S9   | S10 | S11  |  | S12  | S13 | S14 | S15 | S16 |
|------------|------|-----|------|-----|------|------|------|-----|------|-----|------|--|------|-----|-----|-----|-----|
| 1          | 12,1 | 5,9 | 8    | 5   | 10   | 6    | 13   | 12  | 9,5  | 8   | 18   |  | 7    | 13  | 5,5 | 14  | 10  |
| 2          | 12   | 6   | 11   | 5,5 | 12   | 13,5 | 10   | 13  | 12   | 9   | 7,5  |  | 10   | 12  | 5   | 9   | 7   |
| 3          | 17,6 | 8,4 | 8,5  | 4,8 | 6,5  | 11   | 8    | 12  | 10   | 7   | 5    |  | 9    | 6   | 4,5 | 10  | 7,5 |
| 4          | 8    | 4,5 | 13   | 7   | 10   | 8    | 17   | 6   | 11   | 9,5 | 11   |  | 7    | 6   | 6   | 7   | 8   |
| 5          | 11,5 | 5   | 13   | 5,2 | 10,5 | 9    | 5,5  | 10  | 8,5  | 8   | 6    |  | 10,5 | 13  | 4,5 | 5,5 | 4,5 |
| 6          | 6    | 3,7 | 10   | 5   | 6    | 6    | 5    | 4   | 11,5 | 7   | 20   |  | 6,5  | 7,5 | 4,5 | 9   | 7   |
| 7          | 10,6 | 5,1 | 12   | 3,4 | 5,5  | 13,5 | 10,5 | 7   | 10,5 | 6   | 14   |  | 9    | 5,5 | 6   | 6   | 6   |
| 8          | 7,6  | 10  | 7,5  | 5,5 | 17   | 11,5 | 8    | 8   | 18   | 7   | 14   |  | 7    | 7   | 6   | 10  | 7,5 |
| 9          | 9    | 4,8 | 12   | 5   | 6    | 9,2  | 13   | 7,5 | 12   | 5   | 11   |  | 8    | 8   | 5,5 | 5   | 9   |
| 10         | 10,6 | 10  | 6    | 4,8 | 9,5  | 12   | 8,5  | 9   | 9    | 11  | 15   |  | 9    | 5   | 4,5 | 7,5 | 8   |
| 11         | 16   | 3,4 | 10   | 10  | 10   | 6    | 5,5  | 8   | 5    | 8,5 | 10,7 |  | 8    | 4   | 7   | 7   | 6   |
| 12         | 12,5 | 8,5 | 6    | 6,2 | 8    | 10   | 5    | 9   | 6    | 8   | 12   |  | 14   | 5   | 3,5 | 9   | 5   |
| 13         | 9    | 6,2 | 11   | 6   | 9,5  | 6,5  | 6    | 8   | 12,5 | 7   | 16   |  | 7,5  | 7,5 | 10  | 5,5 | 6   |
| 14         | 9    | 3   | 4    | 9   | 8,7  | 14   | 7    | 8   | 14   | 8,5 | 6,5  |  | 6    | 7   | 10  | 7   | 6   |
| 15         | 9    | 3,4 | 7,5  | 7   | 8    | 11   | 5,53 | 4,5 | 10   | 10  | 8    |  | 7    | 6   | 8   | 5   | 6   |
| 16         | 12   | 4   | 6    | 2,8 | 10,5 | 11   | 10,5 | 9,5 | 16   | 7   | 9,5  |  | 8    | 5,5 | 6   | 8,5 | 6   |
| 17         | 11   | 6,1 | 11,5 | 5   | 8    | 7    | 7,5  | 8   | 8    | 9   | 5,5  |  | 8    | 6   | 5   | 7,5 | 8,5 |
| 18         | 6    | 4   | 11   | 2,1 | 4    | 17   | 13   | 9   | 17   | 6   | 4    |  | 10   | 10  | 8   | 5   | 7   |

|    |      |      |      |     |     |      |      |     |      |     |     |  |      |      |      |      |     |
|----|------|------|------|-----|-----|------|------|-----|------|-----|-----|--|------|------|------|------|-----|
| 19 | 11   | 5,5  | 11   | 2,5 | 7   | 16   | 12   | 11  | 8    | 7   | 7   |  | 5    | 5    | 5,5  | 9    | 4,5 |
| 20 | 10,5 | 4,5  | 3,8  | 5   | 6   | 15   | 8    | 10  | 8    | 7   | 9   |  | 9    | 9,5  | 5,5  | 4    | 4   |
| 21 | 10,5 | 5,5  | 9    | 2,2 | 7,5 | 16   | 8,5  | 14  | 16   | 8   | 4,5 |  | 5    | 6    | 7    | 6    | 5,5 |
| 22 | 9    | 4    | 9    | 5,5 | 7   | 5    | 17   | 10  | 11   | 7   | 8   |  | 13   | 9    | 5    | 11   | 6   |
| 23 | 12   | 3,3  | 7    | 5   | 7,5 | 11   | 15   | 12  | 12   | 10  | 6   |  | 5    | 4,5  | 6,5  | 6    | 4,5 |
| 24 | 15   | 4    | 5,5  | 2,5 | 7   | 10   | 8    | 12  | 10   | 6,5 | 16  |  | 10,5 | 5,5  | 10   | 10   | 11  |
| 25 | 14   | 3,8  | 10   | 5   | 5   | 4    | 7    | 7,5 | 12   | 5   | 11  |  | 7    | 5    | 4,5  | 7    | 3   |
| 26 | 9,5  | 3,9  | 7    | 2,4 | 7   | 5,5  | 14   | 10  | 15   | 6   | 8,5 |  | 7    | 5    | 6    | 8,5  | 8   |
| 27 | 11   | 2    | 7,5  | 6,5 | 8   | 9,5  | 4,5  | 12  | 9    | 5   | 18  |  | 8    | 11   | 2    | 10,5 | 3   |
| 28 | 7    | 4    | 5,5  | 2,5 | 6   | 4,5  | 9    | 10  | 17   | 6,5 | 13  |  | 7,5  | 9,5  | 9    | 6    | 5   |
| 29 | 10   | 8,7  | 8    | 3,5 | 8   | 4    | 5,5  | 10  | 11   | 7   | 14  |  | 8    | 9    | 3,5  | 9    | 5   |
| 30 | 7,5  | 12,5 | 6,5  | 5,5 | 7   | 8    | 11   | 10  | 7    | 6   | 4   |  | 5    | 8,5  | 4,5  | 6,5  | 6   |
| 31 | 10   | 8    | 11   | 2,1 | 5   | 4    | 8,5  | 8   | 9    | 7   | 7   |  | 10   | 8    | 6    | 8,5  | 3   |
| 32 | 10   | 6    | 9    | 3,5 | 5   | 10   | 7    | 10  | 13,5 | 7,5 | 14  |  | 7    | 9    | 5    | 8,5  | 3   |
| 33 | 7    | 6,8  | 9    | 7   | 5,5 | 10   | 9    | 4,5 | 9    | 9   | 10  |  | 9    | 7,5  | 8    | 6,5  | 6,5 |
| 34 | 10,5 | 1,3  | 11   | 6   | 6   | 9    | 18   | 8   | 6    | 5,5 | 16  |  | 7,5  | 8    | 5    | 6    | 2   |
| 35 | 11,5 | 6,8  | 13,5 | 3,1 | 6   | 11   | 9    | 8,5 | 7    | 5   | 12  |  | 10   | 7    | 4,5  | 7    | 6   |
| 36 | 16   | 4    | 7,6  | 6   | 8   | 15   | 9    | 10  | 16   | 10  | 7   |  | 10,5 | 6    | 7    | 6,5  | 5,5 |
| 37 | 9    | 5,5  | 10   | 3,6 | 9   | 10   | 6,5  | 7   | 6,5  | 9   | 8   |  | 7    | 7    | 4    | 4,5  | 7,5 |
| 38 | 16,5 | 3,5  | 9,6  | 6   | 5   | 12,5 | 8,5  | 8   | 9    | 4   | 9   |  | 14   | 8    | 10   | 9    | 4,5 |
| 39 | 10,5 | 2,5  | 11,5 | 3,5 | 9   | 10,5 | 4    | 4,5 | 7    | 11  | 5,5 |  | 10   | 4,5  | 2,6  | 5,5  | 4   |
| 40 | 10   | 13   | 8    | 2,5 | 7,5 | 11   | 8,5  | 10  | 7    | 10  | 9   |  | 7,5  | 8    | 2,7  | 5,5  | 3,5 |
| 41 | 11   | 4    | 8,5  | 4,5 | 6   | 9    | 7    | 10  | 10   | 8   | 12  |  | 10   | 9    | 8,5  | 6    | 6   |
| 42 | 7    | 7    | 18   | 2,5 | 7   | 9    | 7,5  | 4,5 | 11   | 11  | 12  |  | 10   | 6,5  | 6    | 4,5  | 2,5 |
| 43 | 11,5 | 2,5  | 7    | 1,9 | 9,5 | 9    | 12   | 8,5 | 3    | 7   | 10  |  | 8    | 7,5  | 3,2  | 6    | 6,5 |
| 44 | 10,5 | 8    | 8    | 6   | 7   | 9    | 6    | 8   | 6,5  | 7   | 11  |  | 7    | 4,5  | 6,5  | 4,5  | 3   |
| 45 | 9    | 5    | 11   | 2,2 | 10  | 20,6 | 5,5  | 6,5 | 4,5  | 12  | 12  |  | 8    | 8    | 11,5 | 5,5  | 5   |
| 46 | 14   | 3,8  | 10   | 7   | 5   | 8    | 6    | 6,5 | 7    | 6   | 11  |  | 8    | 5    | 6    | 8    | 2,5 |
| 47 | 8    | 8    | 10   | 2,8 | 7   | 5,2  | 7    | 10  | 14   | 8   | 10  |  | 10   | 6    | 5    | 11   | 11  |
| 48 | 10,5 | 3,4  | 11   | 4,5 | 6   | 10   | 16   | 7   | 8    | 9   | 13  |  | 8,5  | 5,5  | 4    | 6    | 2   |
| 49 | 10   | 3,5  | 8    | 1,9 | 9,6 | 5,5  | 8    | 12  | 14   | 6   | 15  |  | 8    | 5,5  | 7    | 14   | 9   |
| 50 | 8,5  | 4,9  | 13   | 8   | 15  | 14   | 9,5  | 7   | 7    | 7   | 11  |  | 8    | 5    | 4    | 5    | 2   |
| 51 | 9    | 4    | 12,5 | 4,5 | 8   | 14   | 7,5  | 13  | 9    | 6   | 10  |  | 8    | 7,5  | 6,5  | 5    | 6   |
| 52 | 12   | 3,5  | 12   | 5,5 | 10  | 15   | 12   | 5   | 7    | 9   | 10  |  | 8    | 4,5  | 6    | 6    | 3,5 |
| 53 | 5    | 3,8  | 8    | 4,5 | 5,7 | 3,5  | 13   | 7   | 15   | 9   | 11  |  | 7,5  | 7    | 6,5  | 6,5  | 5,5 |
| 54 | 11,5 | 5,5  | 9    | 3,6 | 5   | 9    | 19   | 9   | 9    | 5   | 10  |  | 9    | 4,5  | 6    | 11   | 2   |
| 55 | 12   | 8    | 10   | 5   | 6   | 7    | 11,5 | 8   | 10   | 11  | 12  |  | 11,5 | 8,5  | 4,5  | 12   | 6   |
| 56 | 11,5 | 4,6  | 8    | 6,8 | 5,1 | 6,5  | 12   | 10  | 7    | 6   | 7,5 |  | 10,5 | 17   | 7    | 8,5  | 2,5 |
| 57 | 11   | 3,5  | 9    | 5   | 5   | 13   | 5,5  | 10  | 10   | 7   | 24  |  | 8,5  | 10,5 | 9    | 6    | 6   |
| 58 | 14   | 4,8  | 7,5  | 8   | 4   | 12   | 5,5  | 10  | 9    | 10  | 16  |  | 7    | 8,5  | 7,5  | 6,5  | 3,5 |
| 59 | 10   | 3,6  | 9,5  | 4,8 | 11  | 10   | 6,5  | 7   | 10   | 6   | 18  |  | 11,5 | 4,5  | 7,5  | 7    | 7,5 |
| 60 | 8    | 4    | 9,4  | 5,6 | 4   | 10   | 12,5 | 10  | 10   | 5   | 10  |  | 11   |      | 9,5  | 6    | 4   |
| 61 | 10   | 4,9  | 11   | 5   | 6   | 10   | 9    | 5   | 15   | 7   | 9   |  | 8    |      | 9    | 6    | 8   |
| 62 | 10   | 4    | 5,5  | 8   | 7   | 9    | 7    | 5   | 18   | 9   | 11  |  | 10   |      | 7    | 6    | 4   |
| 63 | 10   | 4,1  | 10   | 6,4 | 8,5 | 4,5  | 10   | 7,5 | 4    | 6   | 9   |  | 10   |      | 6    | 7    | 6   |

|     |      |     |     |      |      |      |      |     |      |     |  |  |      |  |     |      |     |
|-----|------|-----|-----|------|------|------|------|-----|------|-----|--|--|------|--|-----|------|-----|
| 64  | 19   | 5   | 9,5 | 4,4  | 10   | 5    | 11   | 6   | 20   | 7   |  |  | 8    |  | 6,5 | 5,5  | 6,5 |
| 65  | 10   | 6,4 | 9   | 4,1  | 8    | 5,5  | 14   | 7,5 | 16   | 9   |  |  | 13   |  | 6   | 6,5  | 4,5 |
| 66  | 7,5  | 2   | 7,5 | 5    | 10   | 6    | 10,5 | 5   | 15   | 8   |  |  | 8,5  |  | 8,5 | 5,5  | 4   |
| 67  | 10   | 2,5 | 6   | 5,5  | 6    | 4    | 12   | 7,5 | 10   | 6   |  |  | 7    |  | 4   | 10   | 4,5 |
| 68  | 12   | 4,2 | 7   | 9,5  | 5    | 3,5  | 8    | 13  | 10,5 | 7   |  |  | 5,5  |  | 6   | 7,5  | 4,5 |
| 69  | 12   | 2   | 7,5 | 8    | 5,7  | 7    | 6,5  | 9   | 20   | 6   |  |  | 7,5  |  |     | 6    | 4   |
| 70  | 12   | 5,5 | 9   | 3,5  | 8    | 5,5  | 5,5  | 8,5 | 8    | 8   |  |  | 11   |  |     | 6    | 4   |
| 71  | 9    | 2   | 9   | 13   | 8    | 6    | 10   | 12  | 13   | 8   |  |  | 8    |  |     | 5    | 6   |
| 72  | 9,5  | 7,3 | 8   | 6,5  | 4    | 4    | 7,5  | 7   | 12   | 10  |  |  | 9    |  |     | 12,5 | 4,5 |
| 73  | 11   | 4,1 | 7,5 | 8,5  | 10,5 | 12   | 10   | 10  | 14   | 6   |  |  | 9    |  |     | 14   | 6,5 |
| 74  | 10,5 | 10  | 12  | 3    | 4    | 9    | 7,5  | 6   | 16   | 6   |  |  | 12   |  |     | 9    | 3,5 |
| 75  | 8    | 3   | 7,6 | 4    | 7,5  | 8    | 8,5  | 7,5 | 9    | 13  |  |  | 13,5 |  |     | 8    | 6   |
| 76  | 10   | 4,5 | 10  | 10,5 | 8    | 4,5  | 8,6  | 6,5 | 6    | 4,4 |  |  | 10   |  |     | 10   | 5,5 |
| 77  | 9    | 3,9 | 9   | 7,5  | 9    | 6,5  | 19   | 6   | 13,5 | 6   |  |  |      |  |     | 6,5  | 3   |
| 78  | 11   | 4   | 12  | 5,5  | 8    | 8    | 8,5  | 11  | 6    | 6   |  |  |      |  |     | 10   | 4,5 |
| 79  | 11,5 | 3,5 | 5,5 | 13   | 10   | 14   | 8    | 6   | 11   | 6,5 |  |  |      |  |     | 7    | 4,5 |
| 80  | 11   | 3   | 6,5 | 6    | 10   | 11,2 | 8    | 9   | 11   | 5   |  |  |      |  |     | 5    | 2,5 |
| 81  | 9    | 7   | 12  | 4,9  | 7,5  | 9,5  | 12   | 6   |      | 4   |  |  |      |  |     | 7,5  | 6   |
| 82  | 12   | 4   | 7,2 | 5    | 8    | 9    | 10,5 | 11  |      | 5,5 |  |  |      |  |     | 8    | 3,5 |
| 83  | 11,5 | 5,5 | 12  | 6    | 8,5  | 9    | 10   | 5,5 |      | 9   |  |  |      |  |     | 13   | 8,5 |
| 84  | 9,5  | 6   | 10  | 5    | 12   | 8    | 10   | 12  |      | 4,5 |  |  |      |  |     | 8,5  | 4,5 |
| 85  | 9    | 4,6 | 7   | 4    | 9,5  | 4,5  | 12   | 5   |      | 6   |  |  |      |  |     | 9    | 5,5 |
| 86  | 14,5 | 4   | 10  | 4,6  | 6    | 11,2 | 16   | 10  |      | 7   |  |  |      |  |     | 11   | 3   |
| 87  | 9    | 3,3 | 8   | 6,5  | 7    | 6,5  | 10   | 9   |      | 4   |  |  |      |  |     | 7,5  | 5   |
| 88  | 8,5  | 3   | 8   | 4,5  | 7    | 11,5 | 10   | 12  |      | 5   |  |  |      |  |     | 6    | 5,5 |
| 89  | 5,5  | 4,2 | 4   | 4    | 11   | 4,5  | 7    | 7   |      | 4,5 |  |  |      |  |     |      | 9   |
| 90  | 9    | 4,5 | 12  | 5,5  | 8,5  | 10   | 8    | 8,5 |      | 7   |  |  |      |  |     |      | 7   |
| 91  |      | 3,7 | 9,5 | 5,4  | 4    | 17   | 7    | 9   |      | 6   |  |  |      |  |     |      | 5   |
| 92  |      | 6   | 13  | 3    | 3    | 8,5  | 8    | 6   |      | 7   |  |  |      |  |     |      | 4   |
| 93  |      | 3   | 10  | 4,4  | 7,5  | 11   | 11   | 9   |      | 5,5 |  |  |      |  |     |      | 5   |
| 94  |      | 2   | 9   | 6    | 4,5  | 5    | 7    | 5   |      | 5   |  |  |      |  |     |      | 8   |
| 95  |      | 3,6 | 9   | 6,4  | 3,5  | 8    | 8    | 5   |      | 7,5 |  |  |      |  |     |      | 5   |
| 96  |      | 3   | 17  | 5,5  | 4    | 4,5  | 12   | 6,5 |      | 9   |  |  |      |  |     |      | 6   |
| 97  |      | 5   | 9   | 5    | 7,5  | 4,5  | 5    | 6,5 |      | 5   |  |  |      |  |     |      | 6,5 |
| 98  |      | 2,5 | 8,5 | 5,7  | 4,5  | 6    | 8    | 7   |      | 4,5 |  |  |      |  |     |      | 4,5 |
| 99  |      | 3,7 | 9   | 4    | 5    | 8,5  | 7    | 8   |      | 6   |  |  |      |  |     |      | 9   |
| 100 |      | 3,5 | 8   | 10,5 | 3,5  | 11   | 10   | 8,5 |      | 5   |  |  |      |  |     |      | 4   |
| 101 |      | 4   | 4   | 4,4  | 6    | 10   | 12   | 9   |      | 5   |  |  |      |  |     |      | 4   |
| 102 |      | 5,5 | 10  | 9    | 3    | 11   | 13   | 7,5 |      | 6,5 |  |  |      |  |     |      | 4,5 |
| 103 |      | 3,9 | 5   | 5    | 5    | 9    | 6    | 7   |      | 6   |  |  |      |  |     |      | 3,5 |
| 104 |      | 2   | 9,2 | 4,1  | 3,5  | 5    | 8    | 4   |      | 6   |  |  |      |  |     |      | 4   |
| 105 |      | 3,8 | 4   | 3,5  | 2,5  | 15   | 7    | 7   |      | 3,5 |  |  |      |  |     |      | 2   |
| 106 |      | 3,3 | 6   | 5    | 4,1  | 5    | 11   | 12  |      | 5   |  |  |      |  |     |      | 2,5 |
| 107 |      | 5   | 3,5 | 7,4  | 6    | 9    | 6    | 8   |      | 5,5 |  |  |      |  |     |      | 12  |
| 108 |      | 6,2 | 8   | 4,5  | 3,5  | 15   | 10   | 4,5 |      | 9   |  |  |      |  |     |      | 8   |

|     |  |      |     |     |     |     |     |     |  |    |  |  |  |  |  |  |     |
|-----|--|------|-----|-----|-----|-----|-----|-----|--|----|--|--|--|--|--|--|-----|
| 109 |  | 3,5  | 3   | 5,6 | 4   | 8,5 | 8   | 10  |  | 8  |  |  |  |  |  |  | 3,5 |
| 110 |  | 0,9  | 2,5 | 3   | 3,5 | 9   | 9   | 7   |  | 10 |  |  |  |  |  |  | 8   |
| 111 |  | 4    | 3   | 4   | 3   | 7   | 9   | 13  |  |    |  |  |  |  |  |  | 5   |
| 112 |  | 7    | 3,5 | 5,6 | 7   | 11  | 17  | 16  |  |    |  |  |  |  |  |  | 5   |
| 113 |  | 5    | 2   | 3   | 4,8 | 9,2 | 7   | 12  |  |    |  |  |  |  |  |  | 6   |
| 114 |  | 2    | 3   | 4,6 | 6   | 6,5 | 13  | 15  |  |    |  |  |  |  |  |  | 3   |
| 115 |  | 5,2  | 3,8 | 5   | 7,6 |     | 13  | 10  |  |    |  |  |  |  |  |  | 6   |
| 116 |  | 4    | 5,5 | 5,9 | 3,5 |     | 10  | 12  |  |    |  |  |  |  |  |  | 10  |
| 117 |  | 3,8  | 4   | 3   | 3   |     | 6   | 9   |  |    |  |  |  |  |  |  | 3   |
| 118 |  | 5    | 4,5 | 4   | 3,5 |     | 10  | 10  |  |    |  |  |  |  |  |  | 5   |
| 119 |  | 5,6  | 3,5 | 3   | 7   |     | 7   | 10  |  |    |  |  |  |  |  |  | 3   |
| 120 |  | 5    | 6   | 4,4 | 3,5 |     | 8   | 9   |  |    |  |  |  |  |  |  | 5   |
| 121 |  | 3,5  | 4   | 4   | 2,5 |     | 10  | 10  |  |    |  |  |  |  |  |  | 2,5 |
| 122 |  | 3,8  | 4,5 | 6   | 6,2 |     | 12  | 18  |  |    |  |  |  |  |  |  | 4   |
| 123 |  | 5    | 3,4 | 6,5 | 2   |     | 11  | 20  |  |    |  |  |  |  |  |  | 5,5 |
| 124 |  | 3,5  | 1,5 | 3   | 3   |     | 8   | 12  |  |    |  |  |  |  |  |  | 7   |
| 125 |  | 2,5  | 3,5 | 4,6 | 0,9 |     | 13  | 7   |  |    |  |  |  |  |  |  | 6   |
| 126 |  | 4,8  | 8   | 3,5 | 1,5 |     | 16  | 9   |  |    |  |  |  |  |  |  | 5,5 |
| 127 |  | 4    | 4   | 7,5 | 3   |     | 7   | 9   |  |    |  |  |  |  |  |  | 4   |
| 128 |  | 3,9  | 3,8 | 4,7 | 3   |     | 9,5 | 6,5 |  |    |  |  |  |  |  |  | 8,5 |
| 129 |  | 3,5  |     | 10  | 3,1 |     | 10  | 13  |  |    |  |  |  |  |  |  | 7   |
| 130 |  | 5,6  |     | 7,5 | 5   |     | 11  | 18  |  |    |  |  |  |  |  |  | 8   |
| 131 |  | 4,5  |     | 7,5 | 3   |     | 6,5 | 6,5 |  |    |  |  |  |  |  |  | 7   |
| 132 |  | 4    |     | 8,3 | 2,5 |     |     | 5,5 |  |    |  |  |  |  |  |  | 7   |
| 133 |  | 10,8 |     | 2,5 | 3   |     |     | 4,5 |  |    |  |  |  |  |  |  | 5,5 |
| 134 |  | 4,5  |     | 5   | 3   |     |     | 13  |  |    |  |  |  |  |  |  | 7   |
| 135 |  | 4,4  |     | 11  |     |     |     | 5   |  |    |  |  |  |  |  |  | 4,5 |
| 136 |  | 2    |     | 6   |     |     |     | 5   |  |    |  |  |  |  |  |  | 4   |
| 137 |  | 1,5  |     |     |     |     |     | 7   |  |    |  |  |  |  |  |  | 7   |
| 138 |  | 3,4  |     |     |     |     |     | 6   |  |    |  |  |  |  |  |  | 4,5 |
| 139 |  | 12   |     |     |     |     |     | 7   |  |    |  |  |  |  |  |  | 5   |
| 140 |  | 4    |     |     |     |     |     | 6   |  |    |  |  |  |  |  |  | 6   |
| 141 |  | 10   |     |     |     |     |     | 6   |  |    |  |  |  |  |  |  | 5   |
| 142 |  | 6    |     |     |     |     |     | 7,5 |  |    |  |  |  |  |  |  | 5   |
| 143 |  | 8    |     |     |     |     |     | 8   |  |    |  |  |  |  |  |  | 7   |
| 144 |  | 4,5  |     |     |     |     |     | 5,5 |  |    |  |  |  |  |  |  | 7   |
| 145 |  | 5,5  |     |     |     |     |     | 5,5 |  |    |  |  |  |  |  |  | 8   |
| 146 |  | 4,9  |     |     |     |     |     | 4   |  |    |  |  |  |  |  |  | 6   |
| 147 |  | 4,5  |     |     |     |     |     | 6   |  |    |  |  |  |  |  |  | 8   |
| 148 |  | 3,4  |     |     |     |     |     | 4   |  |    |  |  |  |  |  |  | 10  |
| 149 |  | 4    |     |     |     |     |     | 11  |  |    |  |  |  |  |  |  | 7   |
| 150 |  | 5,5  |     |     |     |     |     | 13  |  |    |  |  |  |  |  |  | 6   |
| 151 |  | 4,5  |     |     |     |     |     | 10  |  |    |  |  |  |  |  |  |     |
| 152 |  | 3,8  |     |     |     |     |     | 9,5 |  |    |  |  |  |  |  |  |     |
| 153 |  | 2,5  |     |     |     |     |     | 8,5 |  |    |  |  |  |  |  |  |     |





|     |  |  |  |  |  |  |  |     |  |  |  |  |  |  |  |  |  |
|-----|--|--|--|--|--|--|--|-----|--|--|--|--|--|--|--|--|--|
| 244 |  |  |  |  |  |  |  | 9   |  |  |  |  |  |  |  |  |  |
| 245 |  |  |  |  |  |  |  | 7   |  |  |  |  |  |  |  |  |  |
| 246 |  |  |  |  |  |  |  | 10  |  |  |  |  |  |  |  |  |  |
| 247 |  |  |  |  |  |  |  | 7,5 |  |  |  |  |  |  |  |  |  |
| 248 |  |  |  |  |  |  |  | 5   |  |  |  |  |  |  |  |  |  |
| 249 |  |  |  |  |  |  |  | 5   |  |  |  |  |  |  |  |  |  |
| 250 |  |  |  |  |  |  |  | 6   |  |  |  |  |  |  |  |  |  |
| 251 |  |  |  |  |  |  |  | 10  |  |  |  |  |  |  |  |  |  |
| 252 |  |  |  |  |  |  |  | 10  |  |  |  |  |  |  |  |  |  |

**Table S3.** WGS84 coordinates for pebble measurement stations

| Station ID | X              | Y               | Z   |
|------------|----------------|-----------------|-----|
| 1          | 5,38050° W     | 35,54843° N     | 280 |
| 2          | 5° 22' 72,9" W | 35° 32' 74,2" N | 283 |
| 3          | 5,38036° W     | 35,54838° N     | 294 |
| 4          | 5,38030° W     | 35,54844° N     | 284 |
| 5          | 5,38042° W     | 35,54864° W     | 284 |
| 6          | 5°22,785 W     | 35° 32,694 N    | 314 |
| 7          | 5° 22,784 " W  | 35° 32,702 N    | 306 |
| 8          | 5° 22,775" W   | 35° 32,696" N   | 311 |
| 9          | 5° 22,764" W   | 35° 32,702 N    | 309 |
| 10         | 5° 22,768 W    | 35° 32,702 N    | 307 |
| 11         | 5° 22,759 W    | 35° 32,702 N    | 308 |
| 12         | 5° 22,759 W    | 35° 32,698 N    | 311 |
| 13         | 5° 22,749 W    | 35° 32,698 N    | 305 |
| 14         | 5° 22,766 W    | 35° 32,717 N    | 280 |
| 15         | 5° 22,766 W    | 35° 32,717 N    | 268 |
| 16         | 5,38101° W     | 35,54860° N     | 258 |

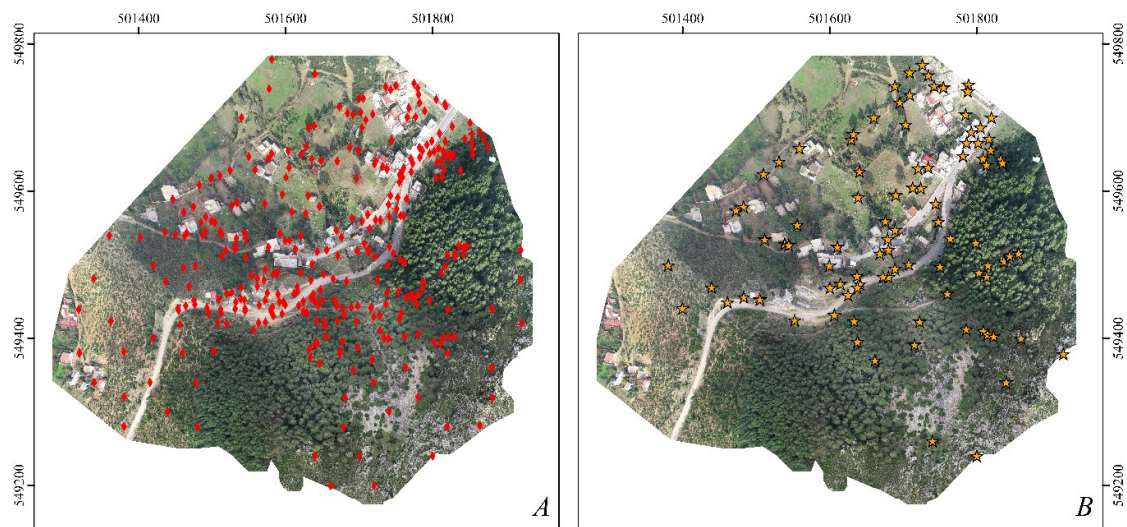

**Figure S1.** Spatial distribution of GCPs used for constructing the UAV-derived DEM (A) and for testing the accuracy of all DEMs used in this study (B).

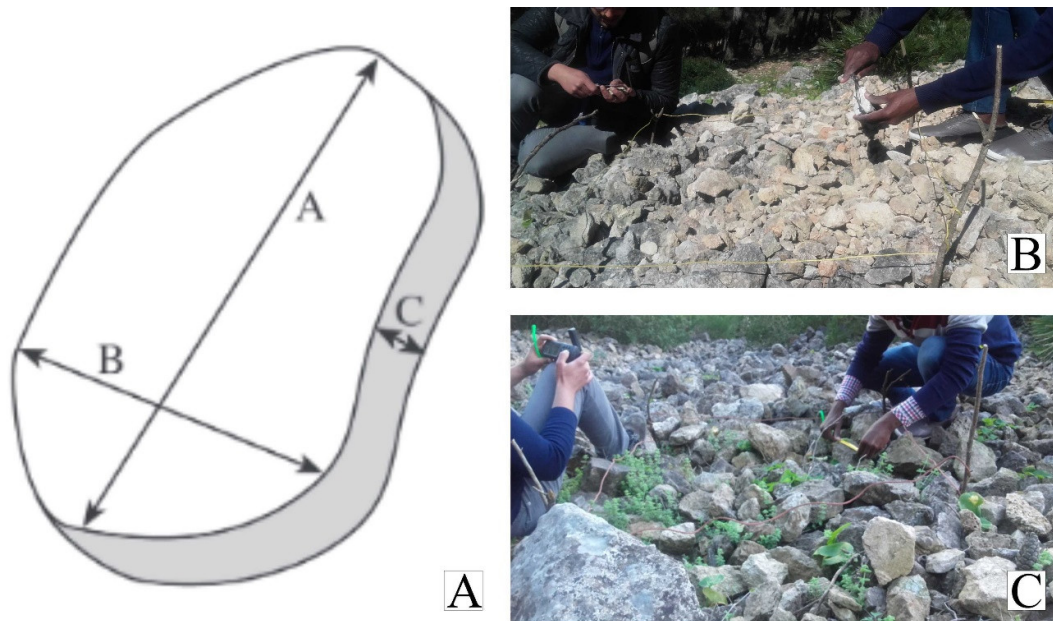

**Figure S2.** Photographs taken during field missions; A- the measured rock clast axes (after [56]). B- and C- are photographs taken in measurement stations 1 and 8.

**Table S4.** EPSG:26191 coordinates of the boulders subject to morphometric analyses;

| X         | Y         |
|-----------|-----------|
| 501775,68 | 549477,21 |
| 501789,7  | 549491,52 |
| 501803,59 | 549463,21 |
| 501801,23 | 549462,21 |
| 501806,95 | 549458,96 |
| 501798,37 | 549443    |
| 501798,37 | 549443    |
| 501798,37 | 549443    |
| 501790,69 | 549444,11 |
| 501794,23 | 549429,57 |
| 501793,16 | 549425,96 |
| 501794,31 | 549427,36 |
| 501794,31 | 549427,36 |
| 501801,3  | 549418,1  |
| 501801,3  | 549418,1  |
| 501805,7  | 549419,6  |
| 501805,7  | 549419,6  |
| 501805,7  | 549419,6  |
| 501805,7  | 549419,6  |
| 501807,8  | 549423,3  |
| 501802,4  | 549416,2  |
| 501816,5  | 549406,9  |



|           |           |
|-----------|-----------|
| 501816,5  | 549406,9  |
| 501816,5  | 549406,9  |
| 501816,5  | 549406,9  |
| 501816,5  | 549406,9  |
| 501816,5  | 549406,9  |
| 501816,5  | 549406,9  |
| 501810,5  | 549423    |
| 501817    | 549403    |
| 501830,9  | 549393,4  |
| 501830,9  | 549393,4  |
| 501830,9  | 549393,4  |
| 501825,72 | 549395,34 |
| 501809,3  | 549378,9  |
| 501809,3  | 549378,9  |
| 501799,8  | 549392    |
| 501742,2  | 549974,55 |
| 501742,2  | 549974,55 |
| 501738,8  | 549483,7  |
| 501732,6  | 549484,1  |
| 501722,1  | 549486,1  |
| 501722,1  | 549486,1  |
| 501765,1  | 549503,7  |
| 501757    | 549505,2  |

**Table S5.** Morphometric measurements of boulders in Bouanane site.

| Clast<br>no. | Clast axes |        |        |
|--------------|------------|--------|--------|
|              | a-axis     | b-axis | c-axis |
| 1            | 114        | 64     | 40     |
| 2            | 110        | 84     | 31     |
| 3            | 180        | 140    | 66     |
| 4            | 101        | 83     | 33     |
| 5            | 162        | 68     | 67     |
| 6            | 423        | 160    | 140    |
| 7            | 156        | 120    | 60     |
| 8            | 123        | 114    | 72     |
| 9            | 110        | 96     | 76     |
| 10           | 104        | 95     | 40     |
| 11           | 153        | 91     | 89     |
| 12           | 157        | 100    | 60     |
| 13           | 177        | 122    | 54     |
| 14           | 266        | 187    | 80     |
| 15           | 162        | 73     | 28     |
| 16           | 285        | 148    | 118    |
| 17           | 117        | 90     | 43     |
| 18           | 90         | 89     | 58     |
| 19           | 100        | 76     | 49     |
| 20           | 148        | 77     | 48     |

|    |     |     |     |
|----|-----|-----|-----|
| 21 | 104 | 80  | 33  |
| 22 | 69  | 58  | 26  |
| 23 | 133 | 88  | 80  |
| 24 | 143 | 90  | 48  |
| 25 | 233 | 160 | 112 |
| 26 | 229 | 140 | 90  |
| 27 | 90  | 58  | 50  |
| 28 | 101 | 65  | 34  |
| 29 | 227 | 115 | 84  |
| 30 | 132 | 120 | 101 |
| 31 | 60  | 44  | 24  |
| 32 | 83  | 43  | 32  |
| 33 | 98  | 85  | 64  |
| 34 | 116 | 102 | 40  |
| 35 | 220 | 190 | 54  |
| 36 | 97  | 60  | 38  |
| 37 | 120 | 44  | 25  |
| 38 | 70  | 35  | 22  |
| 39 | 118 | 94  | 53  |
| 40 | 134 | 114 | 65  |
| 41 | 130 | 75  | 73  |
| 42 | 217 | 99  | 97  |
| 43 | 117 | 85  | 78  |
| 44 | 111 | 97  | 65  |
| 45 | 590 | 400 | 190 |
| 46 | 166 | 89  | 64  |
| 47 | 136 | 95  | 60  |
| 48 | 100 | 95  | 68  |
| 49 | 100 | 70  | 50  |
| 50 | 112 | 70  | 55  |
| 51 | 126 | 123 | 80  |
| 52 | 170 | 90  | 83  |
| 53 | 170 | 110 | 64  |
| 54 | 68  | 47  | 32  |
| 55 | 74  | 64  | 33  |

**Table S6.** Sneed and Folks classification for the boulders investigated in the study area.

| <b>Sneed &amp; Folk classes</b> |              |                |
|---------------------------------|--------------|----------------|
|                                 | <b>Count</b> | <b>Percent</b> |
| <b>Compact</b>                  | 1            | 1,82           |
| <b>Compact-Platy</b>            | 5            | 9,09           |
| <b>Compact-Bladed</b>           | 2            | 3,64           |
| <b>Compact-Elongate</b>         | 5            | 9,09           |
| <b>Platy</b>                    | 6            | 10,91          |
| <b>Bladed</b>                   | 20           | 36,36          |
| <b>Elongate</b>                 | 12           | 21,82          |
| <b>Very-Platy</b>               | 2            | 3,64           |
| <b>Very-Bladed</b>              | 1            | 1,82           |
| <b>Very-Elongate</b>            | 1            | 1,82           |

## References

56. Rosenberg, D.; Shtober-Zisu, N. The Stone Components of the Pits and Pavements. In *An Early Pottery Neolithic Occurrence at Beisamoun, the Hula Valley*, BAR International Series, Israel 2007; pp. 19–34.
